# Supplementary material for: Comparing the Fiscal Consequences of Controlled and Uncontrolled Osteoarthritis Pain Applying a UK Public Economic Perspective
Source: PubMed Central journal article supplement (PMC8238511; doi:10.36469/001c.24629), 2021-06-28
Supplement: jheor_2021_8_1_24629_64064.pdf [file jheor_2021_8_1_24629_64064.pdf]

### Supplementary Online Materials

Martins R, Kotsopoulos N, Kließl MK, Beck C, Abraham L, Large S, Schepman P, Connolly MP. Comparing the fiscal consequences of controlled and uncontrolled osteoarthritis pain applying a UK public economic perspective. *JHEOR*. 2021;8(1)125-134.

[doi:10.36469/jheor.2021.24629](https://doi.org/10.36469/jheor.2021.24629)

Figure S1: Model Diagram

Table S1: PubMed Literature Search Strategy

Figure S2: CONSORT Diagram

Table S2: Health-care Costs: Unit Costs of Health Resources and Sources

Table S3: Health-care Costs: Costs of Medicines and Modelling Assumptions

Table S4: Mean Model Inputs, Probabilistic Parameters and Sources

Table S5: Incremental Results of the Scenario Analyses, Discounted at 3.5% Annually

References

This supplementary material has been provided by the authors to give readers additional information about their work.

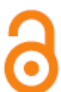

Figure S1: Model Diagram

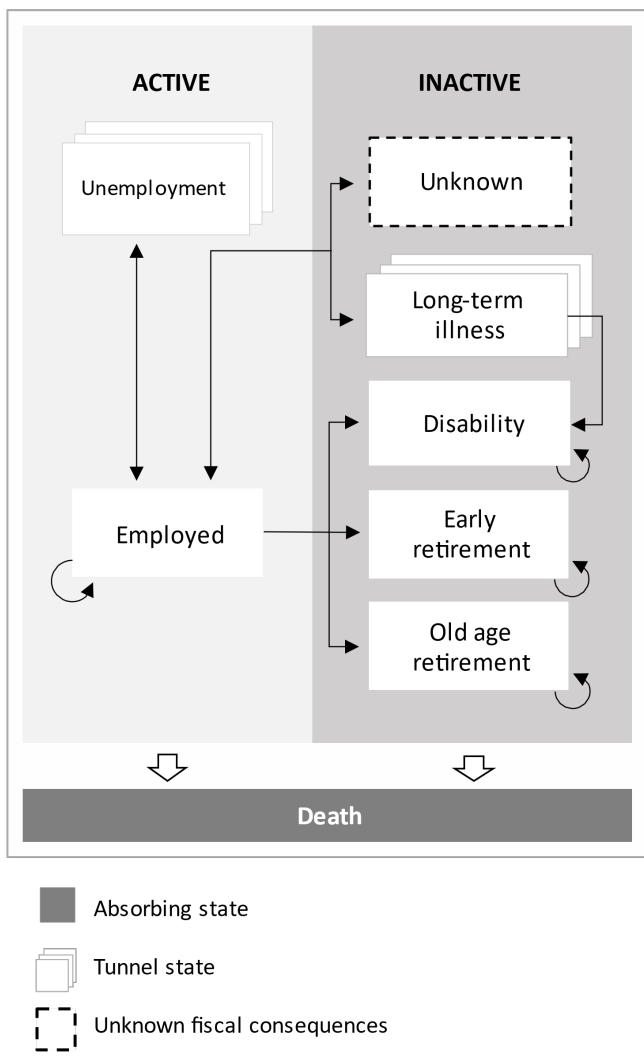

**Table S1: PubMed Literature Search Strategy**

| #         | Search terms <sup>†</sup>                                                                                                                                                                                                                                                                                                                                                                                                                                                                       |
|-----------|-------------------------------------------------------------------------------------------------------------------------------------------------------------------------------------------------------------------------------------------------------------------------------------------------------------------------------------------------------------------------------------------------------------------------------------------------------------------------------------------------|
| 1         | Knee osteoarthritis (MeSH)                                                                                                                                                                                                                                                                                                                                                                                                                                                                      |
| 2         | Knee osteoarthritis (TiAB)                                                                                                                                                                                                                                                                                                                                                                                                                                                                      |
| 3         | Gonarthro* (TiAB)                                                                                                                                                                                                                                                                                                                                                                                                                                                                               |
| 4         | Gonarthritit* (TiAB)                                                                                                                                                                                                                                                                                                                                                                                                                                                                            |
| <b>5</b>  | <b>1 OR 2 OR 3 OR 4</b>                                                                                                                                                                                                                                                                                                                                                                                                                                                                         |
| 6         | Hip osteoarthritis hip (MeSH)                                                                                                                                                                                                                                                                                                                                                                                                                                                                   |
| 7         | Hip osteoarthritis (all)                                                                                                                                                                                                                                                                                                                                                                                                                                                                        |
| 8         | Coxarthrosis (TiAB)                                                                                                                                                                                                                                                                                                                                                                                                                                                                             |
| <b>9</b>  | <b>6 OR 7 OR 8</b>                                                                                                                                                                                                                                                                                                                                                                                                                                                                              |
| 10        | Osteoarthritis (MeSH)                                                                                                                                                                                                                                                                                                                                                                                                                                                                           |
| 11        | (Osteoarthriti* OR OA OR osteo arthriti* or osteoarthros* or osteo arthros* or arthropath* or arthrosis or arthroses) (TiAB)                                                                                                                                                                                                                                                                                                                                                                    |
| 12        | Degenerative arthriti* (TiAB)                                                                                                                                                                                                                                                                                                                                                                                                                                                                   |
| 13        | degenerative joint disease (TiAB)                                                                                                                                                                                                                                                                                                                                                                                                                                                               |
| <b>14</b> | <b>10 OR 11 OR 12 OR 13</b>                                                                                                                                                                                                                                                                                                                                                                                                                                                                     |
| 15        | Knee (TiAB)                                                                                                                                                                                                                                                                                                                                                                                                                                                                                     |
| 16        | Knee Joint (TiAB)                                                                                                                                                                                                                                                                                                                                                                                                                                                                               |
| 17        | (patella* or knee ca* or kneecap* or femorotibial or femoro tibial or tibiofemoral or tibio femoral or patellofemoral or patello femoral) (TiAB)                                                                                                                                                                                                                                                                                                                                                |
| <b>18</b> | <b>15 OR 16 OR 17</b>                                                                                                                                                                                                                                                                                                                                                                                                                                                                           |
| <b>19</b> | <b>14 AND 18</b>                                                                                                                                                                                                                                                                                                                                                                                                                                                                                |
| 20        | Hip (TiAB)                                                                                                                                                                                                                                                                                                                                                                                                                                                                                      |
| 21        | Hip joint (TiAB)                                                                                                                                                                                                                                                                                                                                                                                                                                                                                |
| 22        | (Acetabul* OR femoral OR femoro acetabul* OR head of femur) (TiAB)                                                                                                                                                                                                                                                                                                                                                                                                                              |
| <b>23</b> | <b>20 OR 21 OR 22</b>                                                                                                                                                                                                                                                                                                                                                                                                                                                                           |
| <b>24</b> | <b>14 AND 23</b>                                                                                                                                                                                                                                                                                                                                                                                                                                                                                |
| 25        | Arthralgia (MeSH)                                                                                                                                                                                                                                                                                                                                                                                                                                                                               |
| 26        | Arthralgi* (TiAB)                                                                                                                                                                                                                                                                                                                                                                                                                                                                               |
| 27        | Chronic pain (MeSH)                                                                                                                                                                                                                                                                                                                                                                                                                                                                             |
| 28        | Chronic pain* (TiAB)                                                                                                                                                                                                                                                                                                                                                                                                                                                                            |
| <b>29</b> | <b>25 OR 26 OR 27 OR 28</b>                                                                                                                                                                                                                                                                                                                                                                                                                                                                     |
| <b>30</b> | <b>19 AND 29</b>                                                                                                                                                                                                                                                                                                                                                                                                                                                                                |
| <b>31</b> | <b>24 AND 29</b>                                                                                                                                                                                                                                                                                                                                                                                                                                                                                |
| <b>32</b> | <b>5 OR 9 OR 14 OR 30 OR 31</b>                                                                                                                                                                                                                                                                                                                                                                                                                                                                 |
| <b>33</b> | “cost of Illness”(MeSH)<br>OR “employment” (MeSH)<br>OR “productivity”(TiAB)<br>OR “lost time”(TiAB)<br>OR “employment”(TiAB)<br>OR “employment status”(TiAB)<br>OR “unemployment”(TiAB)<br>OR “underemployment”(TiAB)<br>OR “employment outcome”(TiAB)<br><br>OR “work loss”(TiAB)<br>OR “work productivity”(TiAB)<br>OR “work disability”(TiAB)<br>OR “work participation”(TiAB)<br>OR “work cessation”(TiAB)<br>OR “work status”(TiAB)<br>OR “job loss”(TiAB)<br>OR “job productivity”(TiAB) |

**Table S1: PubMed Literature Search Strategy**

- 33 OR “job cessation”(TiAB)  
OR “job status”(TiAB)
- OR “workers loss”(TiAB)  
OR “workers productivity”(TiAB)  
OR “workers disability”(TiAB)  
OR “workers participation”(TiAB)  
OR “workers cessation”(TiAB)  
OR “workers status”(TiAB)  
OR “worker loss”(TiAB)  
OR “worker productivity”(TiAB)  
OR “worker disability”(TiAB)  
OR “worker participation”(TiAB)  
OR “worker cessation”(TiAB)  
OR “worker status”(TiAB)
- OR “workforce loss”(TiAB)  
OR “workforce disability”(TiAB)  
OR “workforce participation”(TiAB)  
OR “workforce cessation”(TiAB)  
OR “workforce status”(TiAB)
- OR “vocation loss”(TiAB)  
OR “vocation productivity”(TiAB)  
OR “vocation disability”(TiAB)  
OR “vocation participation”(TiAB)  
OR “vocation cessation”(TiAB)  
OR “vocation status”(TiAB)  
OR “vocational loss”(TiAB)  
OR “vocational productivity”(TiAB)  
OR “vocational disability”(TiAB)  
OR “vocational participation”(TiAB)  
OR “vocational cessation”(TiAB)  
OR “vocational status”(TiAB)
- OR “occupation loss”(TiAB)  
OR “occupation productivity”(TiAB)  
OR “occupation disability”(TiAB)  
OR “occupation participation”(TiAB)
- OR “occupation cessation”(TiAB)  
OR “occupation status”(TiAB)  
OR “occupational loss”(TiAB)  
OR “occupational productivity”(TiAB)  
OR “occupational disability”(TiAB)  
OR “occupational participation”(TiAB)  
OR “occupational cessation”(TiAB)  
OR “occupational status”(TiAB)  
OR “employment loss”(TiAB)
- OR “employment productivity”(TiAB)  
OR “employment disability”(TiAB)  
OR “employment participation”(TiAB)  
OR “employment cessation”(TiAB)  
OR “employment status”(TiAB)
- OR “labour force loss”(TiAB)  
OR “labour force productivity”(TiAB)  
OR “labour force disability”(TiAB)  
OR “labour force participation”(TiAB)  
OR “labour force cessation”(TiAB)

**Table S1: PubMed Literature Search Strategy**

33 OR “labour force status”(TiAB)

OR “labor force loss”(TiAB)  
 OR “labor force productivity”(TiAB)  
 OR “labor force disability”(TiAB)  
 OR “labor force participation”(TiAB)  
 OR “labor force cessation”(TiAB)  
 OR “labor force status”(TiAB)

OR “workforce loss”(TiAB)  
 OR “workforce productivity”(TiAB)  
 OR “workforce disability”(TiAB)  
 OR “workforce participation”(TiAB)  
 OR “workforce cessation”(TiAB)  
 OR “workforce status”(TiAB)

OR “work-force loss”(TiAB)  
 OR “work-force productivity”(TiAB)  
 OR “work-force disability”(TiAB)  
 OR “work-force participation”(TiAB)  
 OR “work-force cessation”(TiAB)  
 OR “work-force status”(TiAB)

OR “employee loss”(TiAB)  
 OR “employee productivity”(TiAB)  
 OR “employee disability”(TiAB)  
 OR “employee participation”(TiAB)  
 OR “employee cessation”(TiAB)  
 OR “employee status”(TiAB)

OR “employment loss”(TiAB)  
 OR “employment productivity”(TiAB)  
 OR “employment disability”(TiAB)  
 OR “employment participation”(TiAB)  
 OR “employment cessation”(TiAB)  
 OR “employment status”(TiAB)  
 OR “employment discontinue”(TiAB)

OR “leaving work”(TiAB)  
 OR “leaving job”(TiAB)  
 OR “leaving occupation”(TiAB)  
 OR “leaving employment”(TiAB)  
 OR “leaving labour force”(TiAB)  
 OR “leaving labor force”(TiAB)  
 OR “leaving workforce”(TiAB)  
 OR “leaving work-force”(TiAB)

OR “work incapacity”(TiAB)  
 OR “work incapability”(TiAB)  
 OR “worker incapacity”(TiAB)  
 OR “worker incapability”(TiAB)  
 OR “workers incapacity”(TiAB)  
 OR “workers incapability”(TiAB)  
 OR “working incapacity”(TiAB)  
 OR “working incapability”(TiAB)  
 OR “workforce incapability”(TiAB)  
 OR “workforce incapability”(TiAB)  
 OR “work-force incapability”(TiAB)  
 OR “work-force incapability”(TiAB)  
 OR “vocational incapacity”(TiAB)

**Table S1: PubMed Literature Search Strategy**

33 OR “vocational incapability”(TiAB)  
 OR “occupational incapacity”(TiAB)  
 OR “occupational incapability”(TiAB)  
 OR “employment incapacity”(TiAB)  
 OR “employment incapability”(TiAB)  
 OR “employee incapacity”(TiAB)  
 OR “employee incapability”(TiAB)

OR Retirement(MeSH)  
 OR “retirement”(TiAB)  
 OR “early-retirement”(TiAB)  
 OR “early retirement”(TiAB)  
 OR “pension”(TiAB)  
 OR “early pension”(TiAB)  
 OR “disability pension”(TiAB)  
 OR “disability allowance”(TiAB)  
 OR “social insurance benefit”(TiAB)  
 OR “social insurance payment”(TiAB)  
 OR “transfer payment”(TiAB)

OR “unemployment benefits”(TiAB)  
 OR “welfare”(TiAB)  
 OR “social security”(TiAB)  
 OR “social benefits”(TiAB)

34 32 AND 33

35 Filters: published in the last 10 years; Humans; English; Adult: 19+ years

‡ Similar searches were reproduced in Embase, EconLit and CINHALL.

**Figure S2: CONSORT Diagram**

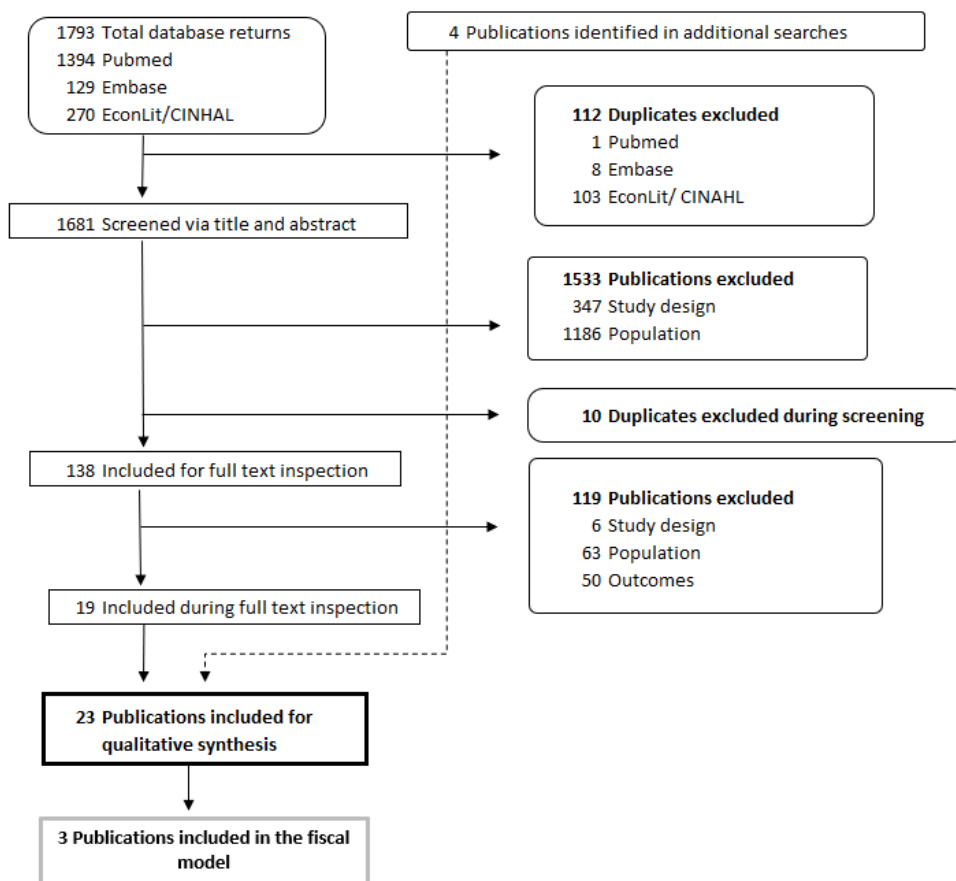

**Table S2: Healthcare Costs: Unit Costs of Health Resources and Sources**

| Parameter                                                                                     | Unit Cost | Weight † | Source                   |
|-----------------------------------------------------------------------------------------------|-----------|----------|--------------------------|
| <b>Referrals and Appointments</b>                                                             |           |          |                          |
| GP appointment                                                                                | £39       | -        | (Curtis and Burns, 2019) |
| <b>Therapy and Investigation</b>                                                              |           |          |                          |
| WF01A - 650 - Physiotherapy - Non-Admitted Face-to-Face Attendance, Follow-up                 | £47       | -        | (NHS, 2020a)             |
| IMAGOP - PF - Imaging: Outpatient - plain film                                                | £22       | -        |                          |
| <b>Secondary Care Specialist</b>                                                              |           |          |                          |
| WF01A - 192 - Trauma & Orthopaedics - Non-Admitted Face-to-Face Attendance, Follow-up         | £116      | -        | (NHS, 2020a)             |
| WF01A - 191 - Pain management - Non-Admitted Face-to-Face Attendance, Follow-up               | £116      | -        |                          |
| WF01A - 410 - Rheumatology - Non-Admitted Face-to-Face Attendance, Follow-up                  | £143      | -        |                          |
| <b>Other</b>                                                                                  |           |          |                          |
| AB23Z - 492 - Acupuncture                                                                     | £67       | -        | (NHS, 2020a)             |
| HN16A - 651 - Occupational therapy                                                            | £140      | -        |                          |
| WF01A - 190 - Anaesthetics - Non-Admitted Face-to-Face Attendance, Follow-up                  | £137      | -        |                          |
| <b>Outpatients</b>                                                                            |           |          |                          |
|                                                                                               | £126      |          |                          |
| 410 - Rheumatology                                                                            | £147      | 2024569  | (NHS, 2020a)             |
| 101 - Urology                                                                                 | £108      | 2007064  |                          |
| 110 - Trauma & Orthopaedics                                                                   | £120      | 5768964  |                          |
| 190 - Anaesthetics                                                                            | £141      | 541858   |                          |
| 191 - Pain Management                                                                         | £157      | 671381   |                          |
| <b>Inpatient (knee)</b>                                                                       |           |          |                          |
|                                                                                               | £1521     |          |                          |
| HN25A - Minor Knee Procedures for Non-Trauma, 19 years and over                               | £2393     | 25       | (NHS, 2020a)             |
| HN25A - Minor Knee Procedures for Non-Trauma, 19 years and over                               | £1515     | 3517     |                          |
| <b>Inpatient (hip)</b>                                                                        |           |          |                          |
|                                                                                               | £1282     |          |                          |
| HN15A - Minor Hip Procedures for Non-Trauma, 19 years and over                                | £2146     | 50       | (NHS, 2020a)             |
| HN15A - Minor Hip Procedures for Non-Trauma, 19 years and over                                | £1262     | 2109     |                          |
| <b>A&amp;E</b>                                                                                |           |          |                          |
| 180 - Accident & Emergency (Total outpatient attendance)                                      | £168      | -        | (NHS, 2020a)             |
| <b>Day Case</b>                                                                               |           |          |                          |
|                                                                                               | £693      | -        |                          |
| AB18Z - Continuous Infusion of Therapeutic Substance for Pain Management                      | £654      | 10955    | (NHS, 2020a)             |
| AB27Z - Injection of Therapeutic Substance into Joint Under Image Control for Pain Management | £716      | 17959    |                          |
| AB28Z - Injection of Therapeutic Substance into Joint for Pain Management                     | £710      | 5036     |                          |
| <b>Costs of Surgery</b>                                                                       |           |          |                          |
| <b>Hip Surgery</b>                                                                            |           |          |                          |
|                                                                                               | £6714     | -        |                          |
| HN12A - Very Major Hip Procedures for Non-Trauma with CC Score 10+                            | £12173    | 896      | (NHS, 2020a)             |
| HN12B - Very Major Hip Procedures for Non-Trauma with CC Score 8-9                            | £9517     | 1260     |                          |
| HN12C - Very Major Hip Procedures for Non-Trauma with CC Score 6-7                            | £8239     | 2993     |                          |
| HN12D - Very Major Hip Procedures for Non-Trauma with CC Score 4-5                            | £7271     | 7151     |                          |
| HN12E - Very Major Hip Procedures for Non-Trauma with CC Score 2-3                            | £6638     | 16498    |                          |
| HN12F - Very Major Hip Procedures for Non-Trauma with CC Score 0-1                            | £6057     | 23937    |                          |
| <b>Knee Surgery</b>                                                                           |           |          |                          |
|                                                                                               | £6296     | -        |                          |
| HN22A - Very Major Knee Procedures for Non-Trauma with CC Score 8+                            | £9675     | 1673     | (NHS, 2020a)             |
| HN22B - Very Major Knee Procedures for Non-Trauma with CC Score 6-7                           | £7661     | 3227     |                          |
| HN22C - Very Major Knee Procedures for Non-Trauma with CC Score 4-5                           | £6,899    | 8535     |                          |
| HN22D - Very Major Knee Procedures for Non-Trauma with CC Score 2-3                           | £6324     | 21231    |                          |
| HN22E - Very Major Knee Procedures for Non-Trauma with CC Score 0-1                           | £5699     | 26470    |                          |
| <b>Surgical Revision</b>                                                                      |           |          |                          |
| Hip - Aseptic causes                                                                          | £12444    | -        | (Vanhegan et al., 2012)  |
| Hip - Infection                                                                               | £22946    | -        |                          |
| Knee - Aseptic causes                                                                         | £10325    | -        | (Kallala et al., 2015)   |
| Knee - Infection                                                                              | £32094    | -        |                          |

† Used to calculate weighted averages.

**Table S3: Costs of Medicines and Modelling Assumptions**

| Drug                                                 | Cost for Model | Units per Package | Dose per Unit  | Cost per Package | Posology EMC                                                                 | Developer Notes *                     |
|------------------------------------------------------|----------------|-------------------|----------------|------------------|------------------------------------------------------------------------------|---------------------------------------|
| <b>Non-opioid</b>                                    |                |                   |                |                  |                                                                              |                                       |
| Paracetamol 500mg tablets                            | £48.43         | 32                | 500 mg         | £1.06            | 2 tablets every 4 hours to a maximum of 8 tablets in 24 hours.               | Assumed 8 tablets daily               |
| Ibuprofen 400mg tablets                              | £68.07         | 24                | 400 mg         | £1.49            | Maximum of 1200 mg daily, taken after food.                                  | Assumed 400 mg 3x daily               |
| Diclofenac sodium 1.16% gel                          | £22.47         | 50 g              | 2 g            | £4.61            | 3-4 times daily according to the need of the situation (about 2-4 g)         | Assumed 3x daily (2g per application) |
| Celecoxib 200mg capsules                             | £31.19         | 30                | 200 mg         | £2.56            | daily dose is 200 mg taken once daily or in two divided doses                | Assumed 200 mg daily                  |
| Etoricoxib 60mg tablets                              | £39.81         | 28                | 60 mg          | £3.05            | 30 to 60 once daily                                                          | Assumed 200 mg daily                  |
| <b>Adjuvant Analgesic Drugs</b>                      |                |                   |                |                  |                                                                              |                                       |
| Amitriptyline                                        | £24.41         | 28                | 50 mg          | 1.87             | 25 mg - 75 mg daily in the evening                                           | Assumed 50 mg daily                   |
| Pregabalin                                           | £21.80         | 56                | 150 mg         | 3.34             | Start with 150 mg daily, may be increased to 300 mg                          | Assumed 150 mg daily                  |
| <b>Price of Opioid and Co-prescribed Medications</b> |                |                   |                |                  |                                                                              |                                       |
| <b>Strong Opioid Analgesic</b>                       |                |                   |                |                  |                                                                              |                                       |
| Buprenorphine transdermal patch 10 mcg/h             | £411.84        | 4                 | 10 mcg/h       | £31.55           | Start with lowest dose (5 mcg/h), replace every 7 days                       | Assumed 10 mcg/h                      |
| Morphine 10 mg modified-release tablets              | £126.71        | 60                | 10 mg          | £5.20            | One or 2 tablets twice daily                                                 | Assumed 20 mg twice daily             |
| Fentanyl 25 mcg/h transdermal patches                | £438.36        | 5                 | 25 mcg/h       | £17.99           | Replace every 72h                                                            | Assumed 25 mcg/h                      |
| Oxycodone 10 mg modified-release tablets             | £326.86        | 56                | 10 mg          | £25.04           | 20 mg oral morphine equivalent to 10 mg oral oxycodone                       | Assumed 10 mg twice daily             |
| <b>Weak Opioid Analgesic</b>                         |                |                   |                |                  |                                                                              |                                       |
| Tramadol 100 mg modified-release tablets             | £176.29        | 60                | 100 mg         | £14.47           | The usual initial dose is 50-100 mg tramadol hydrochloride twice daily       | Assumed 100 mg twice daily            |
| Tramadol 37.5mg / Paracetamol 325mg tablets          | £119.40        | 60                | 37.7 mg/325 mg | £2.45            | Do not exceed 8 daily tablets                                                | Assumed 2x tablets, 4x daily          |
| Codeine phosphate 15 mg tablets                      | £61.61         | 28                | 15 mg          | £1.18            | Maximum dose 240 mg/day                                                      | Assumed 15 mg, 4x daily               |
| Dihydrocodeine 60mg modified release tablets         | £67.88         | 56                | 60 mg          | £5.20            | One or 2 tablets twice daily                                                 | Assumed 60 mg tablet twice daily      |
| Meptazinol 200 mg tablets                            | £288.61        | 112               | 200 mg         | £22.11           | 200mg 3-6 hourly as required. Usually one tablet 4 hourly.                   | Assumed 200 mg 4x daily               |
| <b>Compound Analgesic Containing Weak Opioid</b>     |                |                   |                |                  |                                                                              |                                       |
| Co-codamol 15mg/500mg tablets                        | £59.36         | 100               | 15 mg/500 mg   | £4.06            | 200mg 3-6 hourly as required. Usually one tablet 4 hourly.                   | Assumed 200 mg 4x daily               |
| <b>Co-prescribed Medication</b>                      |                |                   |                |                  |                                                                              |                                       |
| <b>Laxative</b>                                      |                |                   |                |                  |                                                                              |                                       |
| Senna 7.5mg tablets                                  | £14.07         | 60                | 7.5 mg         | £2.31            | 1 or 2 tablets daily                                                         | Assumed 1 tablet daily                |
| Docusate 100 mg capsules                             | £50.93         | 30                | 100 mg         | £2.09            | Maximum of 500 mg daily                                                      | Assumed 200 mg daily                  |
| <b>Gastro-protective agent</b>                       |                |                   |                |                  |                                                                              |                                       |
| Omeprazole 20mg gastro-resistant capsules            | £15.40         | 28                | 20 mg          | £1.18            | Once daily in the prevention of NSAID-associated gastric and duodenal ulcers | Assumed 20 mg daily                   |
| <b>Anti-emetic</b>                                   |                |                   |                |                  |                                                                              |                                       |
| Ondansetron 8mg tablets                              | £126.46        | 10                | 8 mg           | £1.73            | 8 mg every 12 hours max 32 mg daily                                          | Assumed 8 mg twice daily              |

Abbreviations: EMC, electronic medicines compendium; NSAID, non-steroidal anti-inflammatory drug  
 Medicine consumption rate was informed by the publication by Hart and colleagues (Hart et al., 2015). Prices were sourced from NHS drug tariff (NHS, 2020b). Posology was based on summary product characteristics available from the EMC (<https://www.medicines.org.uk/emc/>).

\* Developer assumptions.



**Table S4: Mean Model Inputs, Probabilistic Parameters and Sources**

| Parameter name                                          | Mean  | Distribution | Alpha     | Beta       | Source                    |
|---------------------------------------------------------|-------|--------------|-----------|------------|---------------------------|
| <b>Baseline Probabilities of Entering Fiscal States</b> |       |              |           |            |                           |
| <b>Employment</b>                                       |       |              |           |            |                           |
| 35 to 49 years                                          | 0.846 | Beta         | 5 398 272 | 984 310    |                           |
| 50 to 64 years                                          | 0.718 | Beta         | 4 581 624 | 1 803 694  | (ONS, 2020a)              |
| 65 to 69 years                                          | 0.107 | Beta         | 645 836   | 5 414 506  |                           |
| 70 to 75 years                                          | 0.015 | Beta         | 552 619   | 31 954 381 | (ONS, 2020b)              |
| <b>Unemployment</b>                                     |       |              |           |            |                           |
| 35 to 49 years                                          | 0.026 | Beta         | 165 095   | 6 217 486  |                           |
| 50 to 64 years                                          | 0.028 | Beta         | 173 692   | 6 211 626  | (ONS, 2020a)              |
| 65 to 69 years                                          | 0.016 | Beta         | 91 608    | 5 968 734  |                           |
| <b>Long-term Sickness</b>                               |       |              |           |            |                           |
| 35 to 49 years                                          | 0.031 | Beta         | 18 616    | 583 073    |                           |
| 50 to 64 years                                          | 0.031 | Beta         | 25 806    | 820 151    | (ONS, 2020c)              |
| 65+ years                                               | 0.061 | Beta         | 101 931   | 1 578 139  |                           |
| <b>Disability</b>                                       |       |              |           |            |                           |
| 45 to 49 years                                          | 0.033 | Beta         | 0.075     | 2.159      |                           |
| 50 to 54 years                                          | 0.039 | Beta         | 0.105     | 2.615      |                           |
| 55 to 59 years                                          | 0.043 | Beta         | 0.133     | 2.975      |                           |
| 60 to 64 years                                          | 0.059 | Beta         | 0.265     | 4.256      |                           |
| 65 to 69 years                                          | 0.369 | Beta         | 8.235     | 14.059     | (ONS, 2019)               |
| 70 to 74 years                                          | 0.434 | Beta         | 10.217    | 13.343     |                           |
| 75 to 79 years                                          | 0.506 | Beta         | 12.149    | 11.847     |                           |
| 80 to 84 years                                          | 0.588 | Beta         | 13.653    | 9.577      |                           |
| 85 to 89 years                                          | 0.705 | Beta         | 13.962    | 5.855      |                           |
| 90+ years                                               | 0.811 | Beta         | 11.612    | 2.702      |                           |
| <b>Early Retirement</b>                                 |       |              |           |            |                           |
| 35 to 49 years                                          | 0.017 | Beta         | 14 206    | 831 752    |                           |
| 50 to 64 years                                          | 0.033 | Beta         | 56 111    | 1 623 960  | (ONS, 2020a)              |
| 65+ years                                               | 0.115 | Beta         | 622 429   | 4 794 138  | Assumption                |
| <b>Proportion of Males</b>                              |       |              |           |            |                           |
| Males (hip)                                             | 41%   | Beta         | 476 754   | 745 692    | (Morgan et al., 2019)     |
| Males (knee)                                            |       | Beta         | 762 097   | 1 010 221  |                           |
| <b>Fiscal Outcomes (Relative measures)</b>              |       |              |           |            |                           |
| <b>Employment (reduced tax)</b>                         |       |              |           |            |                           |
| Severe hip/knee vs asymptomatic [OR]                    | 0.280 | Lognormal    | -1.273    | 0.582      | (Ackerman et al., 2013)   |
| Moderate hip/knee vs asymptomatic [OR]                  | 0.570 | Lognormal    | -0.562    | 0.508      | (Ackerman et al., 2013)   |
| <b>Unemployment (job seeking benefits)</b>              |       |              |           |            |                           |
| Hip/knee OA vs no-OA [OR]                               | 1.970 | Lognormal    | 0.678     | 0.224      | (Laires et al., 2018)     |
| <b>Sick Leave (not covered by employer)</b>             |       |              |           |            |                           |
| Knee OA vs no-OA [RR] 55 to 64 years                    | 1.800 | Lognormal    | 0.588     | 0.023      |                           |
| Knee OA vs no-OA [RR] 45 to 54 years                    | 1.930 | Lognormal    | 0.658     | 0.033      | (Hubertsson et al., 2013) |
| Knee OA vs no-OA [RR] 35 to 44 years                    | 2.160 | Lognormal    | 0.770     | 0.053      |                           |
| <b>Early Retirement</b>                                 |       |              |           |            |                           |
| Hip/knee OA vs no-OA [OR]                               | 1.430 | Lognormal    | 0.358     | 0.202      | (Laires et al., 2018)     |

Table S4: Mean Model Inputs, Probabilistic Parameters and Sources

| Parameter name                                                               | Mean  | Distribution | Alpha   | Beta   | Source                    |
|------------------------------------------------------------------------------|-------|--------------|---------|--------|---------------------------|
| <b>Disability Pension</b>                                                    |       |              |         |        |                           |
| Knee OA vs no-OA [RR] 55 to 64 years                                         | 1.510 | Lognormal    | 0.412   | 0.017  |                           |
| Knee OA vs no-OA [RR] 45 to 54 years                                         | 1.610 | Lognormal    | 0.476   | 0.035  | (Hubertsson et al., 2013) |
| Knee OA vs no-OA [RR] 35 to 44 years                                         | 1.720 | Lognormal    | 0.542   | 0.084  |                           |
| <b>OA Related Mortality</b>                                                  |       |              |         |        |                           |
| HR of Death per 10-point Increase in WOMAC Score                             | 1.040 | Lognormal    | 0.039   | 0.015  | (Hawker et al., 2014)     |
| HR of Death OA vs No OA                                                      | 1.110 | Lognormal    | 0.104   | 0.025  | (Wilkie et al., 2019)     |
| <b>Fiscal Costs</b>                                                          |       |              |         |        |                           |
| <b>Median Weekly Pay for Full-time Employees by Age Group - Employment</b>   |       |              |         |        |                           |
| 40-49                                                                        | £678  | Gamma        | 100.000 | 27.100 |                           |
| 50-59                                                                        | £623  | Gamma        | 100.000 | 24.932 | (Francis-Devine, 2019)    |
| 60+                                                                          | £549  | Gamma        | 100.000 | 21.968 |                           |
| <b>Jobseeker's allowance - unemployment (25 or over -weekly)</b>             | £74   | Gamma        | 100.000 | 2.974  | (UK Government, 2020c)    |
| <b>Employment and Support Allowance (ESA) - illness (long term) - weekly</b> | £94   | Gamma        | 100.000 | 3.758  | (UK Government, 2020b)    |
| <b>Personal Independence Payment – Disability<sup>y</sup></b>                |       |              |         |        |                           |
| Daily living part (weekly minimum)                                           | £60   | Gamma        | 100.000 | 2.388  |                           |
| Daily living part (weekly maximum)                                           | £89   | Gamma        | 100.000 | 3.566  | (UK Government, 2020e)    |
| Mobility part (weekly minimum)                                               | £24   | Gamma        | 100.000 | 0.944  |                           |
| Mobility part (weekly maximum)                                               | £62   | Gamma        | 100.000 | 2.490  |                           |
| <b>Early Retirement and State Pension Retirement</b>                         |       |              |         |        |                           |
| Basic State Pension (weekly)                                                 | £134  | Gamma        | 100.000 | 5.360  | (UK Government, 2020d)    |
| New Basic State Pension (weekly)                                             | £175  | Gamma        | 100.000 | 7.008  |                           |
| Attendance Allowance (weekly minimum) <sup>§</sup>                           | £60   | Gamma        | 100.000 | 2.388  | (UK Government, 2020a)    |
| Attendance Allowance (weekly maximum)                                        | £89   | Gamma        | 100.000 | 3.566  |                           |
| <b>Hip and Knee Rates Surgery<sup>z</sup></b>                                |       |              |         |        |                           |
| <b>10-year Risk of Primary Total Hip Replacement (males)</b>                 |       |              |         |        |                           |
| 40 years                                                                     | 0.0%  |              |         |        | Assumption                |
| 50 years                                                                     | 0.8%  | Beta         | 39      | 4838   |                           |
| 60 years                                                                     | 2.2%  | Beta         | 73      | 3232   | (Culliford et al., 2012)  |
| 70 years                                                                     | 3.5%  | Beta         | 81      | 2225   |                           |
| 80 years                                                                     | 2.4%  | Beta         | 30      | 1215   |                           |
| <b>10-year risk of Primary Total Hip Replacement (females)</b>               |       |              |         |        |                           |
| 40 years                                                                     | 0.0%  |              |         |        | Assumption                |
| 50 years                                                                     | 1.1%  | Beta         | 51      | 4591   |                           |
| 60 years                                                                     | 3.5%  | Beta         | 107     | 2962   | (Culliford et al., 2012)  |
| 70 years                                                                     | 5.2%  | Beta         | 136     | 2484   |                           |
| 80 years                                                                     | 3.5%  | Beta         | 71      | 1955   |                           |
| <b>10-year risk of Primary Total Knee Replacement (males)</b>                |       |              |         |        |                           |
| 40 years                                                                     | 0.0%  |              |         |        | Assumption                |
| 50 years                                                                     | 0.6%  | Beta         | 22      | 3643   |                           |
| 60 years                                                                     | 2.6%  | Beta         | 84      | 3131   | (Culliford et al., 2012)  |
| 70 years                                                                     | 4.4%  | Beta         | 98      | 2137   |                           |
| 80 years                                                                     | 2.6%  | Beta         | 35      | 1310   |                           |
| <b>10-year Risk of Primary Total Knee Replacement (females)</b>              |       |              |         |        |                           |
| 40 years                                                                     | 0.0%  |              |         |        | Assumption                |

**Table S4: Mean Model Inputs, Probabilistic Parameters and Sources**

| Parameter name                                              | Mean     | Distribution | Alpha   | Beta      | Source                          |
|-------------------------------------------------------------|----------|--------------|---------|-----------|---------------------------------|
| 50 years                                                    | 1.1%     | Beta         | 51      | 4591      | (Culliford et al., 2012)        |
| 60 years                                                    | 3.1%     | Beta         | 99      | 3105      |                                 |
| 70 years                                                    | 5.2%     | Beta         | 136     | 2484      |                                 |
| 80 years                                                    | 3.2%     | Beta         | 68      | 2047      |                                 |
| <b>Revision Rates</b>                                       |          |              |         |           |                                 |
| <b>Aseptic Revision (hip)</b>                               |          |              |         |           |                                 |
| Cumulative hip revision rate (10 years)                     | 4.6%     | Beta         | 54 321  | 1 136 932 |                                 |
| Annual probability of revision                              | 0.5%     | Beta         | 25 195  | 5 385 644 |                                 |
| <b>Septic Revision (hip)</b>                                |          |              |         |           |                                 |
| Revisions due to infection per 1000 prosthesis-year         | 38.0%    | Beta         | 215     | 350       | (National Joint Registry, 2020) |
| Annual probability of revision due to infection             | 0.0%     | Beta         | 347     | 911 652   |                                 |
| <b>Aseptic Revision (knee)</b>                              |          |              |         |           |                                 |
| Cumulative hip revision rate (10 years)                     | 3.4%     | Beta         | 39,161  | 1 105 891 |                                 |
| Annual probability of revision                              | 0.3%     | Beta         | 21,425  | 6 146 249 |                                 |
| <b>Septic Revision (knee)</b>                               |          |              |         |           |                                 |
| Revisions due to infection per 1000 prosthesis-year         | 92.0%    | Beta         | 649     | 56        |                                 |
| Annual probability of revision due to infection             | 0.1%     | Beta         | 8,121   | 8 819 105 |                                 |
| <b>Healthcare Costs</b>                                     |          |              |         |           |                                 |
| <b>Total Controlled Pain Costs (annual)</b>                 | £916.17  |              |         |           | Calculated                      |
| Total drugs                                                 | £203.35  |              |         |           |                                 |
| Total appointments                                          | £712.82  |              |         |           |                                 |
| <b>Total Uncontrolled Pain Costs (annual)</b>               | £1099.40 |              |         |           |                                 |
| Total drugs                                                 | £244.01  |              |         |           |                                 |
| Total appointments                                          | £855.38  |              |         |           |                                 |
| <b>Drug use</b>                                             |          |              |         |           |                                 |
| <b>Proportion Treated by</b>                                |          |              |         |           |                                 |
| Non-opioid                                                  | 86.7%    | Beta         | 229     | 35        | (Hart et al., 2015)             |
| Paracetamol                                                 | 49.2%    | Beta         | 130     | 134       |                                 |
| Systemic NSAID                                              | 58.0%    | Beta         | 153     | 111       |                                 |
| Topical NSAID                                               | 31.8%    | Beta         | 84      | 180       |                                 |
| COX-II inhibitor                                            | 8.0%     | Beta         | 21      | 243       |                                 |
| Other non-opioid analgesic                                  | 4.5%     | Beta         | 12      | 252       |                                 |
| Opioid                                                      | 96.2%    | Beta         | 254     | 10        |                                 |
| Compound analgesic (containing weak opioid)                 | 73.5%    | Beta         | 194     | 70        |                                 |
| Weak opioid analgesic                                       | 61.0%    | Beta         | 161     | 103       |                                 |
| Strong opioid analgesic                                     | 16.7%    | Beta         | 44      | 220       |                                 |
| Adjuvant analgesic drugs (eg: amitriptyline and pregabalin) | 58.3%    | Beta         | 154     | 110       |                                 |
| <b>Drug Costs</b>                                           |          |              |         |           |                                 |
| Non-opioid                                                  | £64.47   | Gamma        | 100.000 | 2.579     | (Hart et al., 2015)             |
| Paracetamol                                                 | £48.43   | Gamma        | 100.000 | 1.937     |                                 |
| Systemic NSAID                                              | £68.07   | Gamma        | 100.000 | 2.723     |                                 |
| Topical NSAID                                               | £22.47   | Gamma        | 100.000 | 0.899     |                                 |
| COX-II inhibitor                                            | £35.50   | Gamma        | 100.000 | 1.420     |                                 |
| Other non-opioid analgesic                                  | £23.10   | Gamma        | 100.000 | 0.924     |                                 |
| Opioid                                                      | £125.40  | Gamma        | 100.000 | 5.016     |                                 |
| Compound analgesic (containing weak opioid)                 | £59.36   | Gamma        | 100.000 | 2.374     |                                 |

**Table S4: Mean Model Inputs, Probabilistic Parameters and Sources**

| Parameter name                                              | Mean    | Distribution | Alpha   | Beta   | Source              |
|-------------------------------------------------------------|---------|--------------|---------|--------|---------------------|
| Weak opioid analgesic                                       | £116.42 | Gamma        | 100.000 | 4.657  |                     |
| Strong opioid analgesic                                     | £94.32  | Gamma        | 100.000 | 3.773  |                     |
| Adjuvant analgesic drugs (eg: amitriptyline and pregabalin) | £23.10  | Gamma        | 100.000 | 0.924  |                     |
| Average                                                     | £13.48  | Gamma        | 100.000 | 0.539  |                     |
| <b>Proportion Treated by</b>                                |         |              |         |        |                     |
| <b>Opioids and Co-prescribed Medication</b>                 |         |              |         |        |                     |
| Strong opioid analgesic                                     | 16.7%   | Beta         | 44      | 220    |                     |
| Buprenorphine                                               | 9.8%    | Beta         | 26      | 238    |                     |
| Morphine                                                    | 5.3%    | Beta         | 14      | 250    |                     |
| Fentanyl patch                                              | 3.8%    | Beta         | 10      | 254    |                     |
| Oxycodone                                                   | 3.4%    | Beta         | 9       | 255    |                     |
| Weak opioid analgesic                                       | 61.0%   | Beta         | 161     | 103    |                     |
| Tramadol                                                    | 41.7%   | Beta         | 110     | 154    |                     |
| Tramadol and paracetamol                                    | 4.5%    | Beta         | 12      | 252    | (Hart et al., 2015) |
| Codeine                                                     | 13.6%   | Beta         | 36      | 228    |                     |
| Dihydrocodeine                                              | 12.9%   | Beta         | 34      | 230    |                     |
| Meptazinol                                                  | 0.4%    | Beta         | 1       | 263    |                     |
| Co-prescribed medication                                    | 54.9%   | Beta         | 145     | 119    |                     |
| Laxative                                                    | 40.9%   | Beta         | 108     | 156    |                     |
| Gastro-protective agent                                     | 48.5%   | Beta         | 128     | 136    |                     |
| Anti-emetic                                                 | 11.4%   | Beta         | 30      | 234    |                     |
| <b>Drug Costs</b>                                           |         |              |         |        |                     |
| <b>Opioids and Co-prescribed Medication</b>                 |         |              |         |        |                     |
| Strong opioid analgesic                                     | £75.03  | Gamma        | 100.000 | 3.001  |                     |
| Buprenorphine                                               | £411.84 | Gamma        | 100.000 | 16.474 |                     |
| Morphine                                                    | £126.71 | Gamma        | 100.000 | 5.068  |                     |
| Fentanyl patch                                              | £438.36 | Gamma        | 100.000 | 17.534 |                     |
| Oxycodone                                                   | £326.86 | Gamma        | 100.000 | 13.074 |                     |
| Weak opioid analgesic                                       | £97.12  | Gamma        | 100.000 | 3.885  |                     |
| Tramadol                                                    | £176.29 | Gamma        | 100.000 | 7.052  |                     |
| Tramadol and paracetamol                                    | £119.40 | Gamma        | 100.000 | 4.776  | (Hart et al., 2015) |
| Codeine                                                     | £61.61  | Gamma        | 100.000 | 2.465  |                     |
| Dihydrocodeine                                              | £67.88  | Gamma        | 100.000 | 2.715  |                     |
| Meptazinol                                                  | £288.61 | Gamma        | 100.000 | 11.545 |                     |
| Co-prescribed medication                                    | £19.30  | Gamma        | 100.000 | 0.772  |                     |
| Laxative                                                    | £32.50  | Gamma        | 100.000 | 1.300  |                     |
| Gastro-protective agent                                     | £15.40  | Gamma        | 100.000 | 0.616  |                     |
| Anti-emetic                                                 | £126.46 | Gamma        | 100.000 | 5.059  |                     |
| <b>Referrals for Pain Management</b>                        |         |              |         |        |                     |
| <b>Proportion Referred</b>                                  |         |              |         |        |                     |
| No referral                                                 | 29.2%   | Beta         | 77      | 187    |                     |
| Referral rate                                               | 70.8%   | Beta         | 187     | 77     |                     |
| <b>Therapy and Investigation</b> (Hart et al., 2015)        |         |              |         |        |                     |
| Physiotherapy                                               | 39.0%   | Beta         | 103     | 161    |                     |
| Radiology                                                   | 37.5%   | Beta         | 99      | 165    |                     |

**Table S4: Mean Model Inputs, Probabilistic Parameters and Sources**

| Parameter name                   | Mean     | Distribution | Alpha   | Beta   | Source              |
|----------------------------------|----------|--------------|---------|--------|---------------------|
| <b>Secondary care specialist</b> |          |              |         |        |                     |
| Orthopaedics                     | 30.3%    | Beta         | 80      | 184    | (Hart et al., 2015) |
| Pain clinic                      | 8.0%     | Beta         | 21      | 243    |                     |
| Rheumatology                     | 6.1%     | Beta         | 16      | 248    |                     |
| Other referral sites             | 42.0%    | Beta         | 111     | 153    |                     |
| <b>Costs</b>                     |          |              |         |        |                     |
| Therapy and investigation        | £81.58   | Gamma        | 100.000 | 3.263  | (Hart et al., 2015) |
| Physiotherapy                    | £14.07   | Gamma        | 100.000 | 0.563  |                     |
| Radiology                        | £22.17   | Gamma        | 100.000 | 0.887  |                     |
| <b>Secondary Care Specialist</b> |          |              |         |        |                     |
| Orthopaedics                     | £116.07  | Gamma        | 100.000 | 4.643  | (Hart et al., 2015) |
| Pain clinic                      | £116.18  | Gamma        | 100.000 | 4.647  |                     |
| Rheumatology                     | £143.49  | Gamma        | 100.000 | 5.740  |                     |
| Other referral sites             | £114.79  | Gamma        | 100.000 | 4.592  |                     |
| <b>Appointments</b>              |          |              |         |        |                     |
| <b>Proportion of Patients</b>    |          |              |         |        |                     |
| Pain related GP visits           | 74.6%    | Beta         | 197     | 67     | (Hart et al., 2015) |
| Non-pain related GP visits       | 79.9%    | Beta         | 211     | 53     |                     |
| Physiotherapy                    | 28.8%    | Beta         | 76      | 188    |                     |
| Outpatients                      | 50.4%    | Beta         | 133     | 131    |                     |
| Inpatients                       | 12.5%    | Beta         | 33      | 231    |                     |
| A&E                              | 8.3%     | Beta         | 22      | 242    |                     |
| Day case                         | 6.4%     | Beta         | 17      | 247    |                     |
| <b>Number of Appointments</b>    |          |              |         |        |                     |
| Pain related GP visits           | 3        | Uniform      | 0       | 21     | (Hart et al., 2015) |
| Non-pain related GP visits       | 9.4      | Uniform      | 0       | 43     |                     |
| Physiotherapy                    | 0.3      | Uniform      | 0       | 7      |                     |
| Outpatients                      | 1        | Uniform      | 0       | 7      |                     |
| Inpatients                       | 0.1      | Uniform      | 0       | 2      |                     |
| A&E                              | 0.1      | Uniform      | 0       | 1      |                     |
| Day case                         | 0.1      | Uniform      | 0       | 3      |                     |
| <b>Costs</b>                     |          |              |         |        |                     |
| Pain related GP visits           | £117.69  | Gamma        | 100.000 | 4.708  | (Hart et al., 2015) |
| Non-pain related GP visits       | £368.76  | Gamma        | 100.000 | 14.750 |                     |
| Physiotherapy                    | £14.07   | Gamma        | 100.000 | 0.563  |                     |
| Outpatients                      | £126.12  | Gamma        | 100.000 | 5.045  |                     |
| Inpatients                       | £1401.85 | Gamma        | 100.000 | 56.074 |                     |
| A&E                              | £16.83   | Gamma        | 100.000 | 0.673  |                     |
| Day case                         | £69.35   | Gamma        | 100.000 | 2.774  |                     |
| <b>Average</b>                   | £631.24  | Gamma        | 100.000 | 25.250 |                     |

<sup>‡</sup>Probabilities were converted to annual rates and then to annual probabilities (Briggs et al., 2006)

<sup>‡</sup> Assumed 100% people with disability would receive the daily living part and mobility part (50% maximum, 50% minimum).

<sup>§</sup> Assumed that 90% would get minimum and 10% would get maximum.

When variability data on costs was not available, a relative standard error of 10% was assumed for the gamma distributions.

Table S5: Incremental Results of the Scenario Analyses, Discounted at 3.5% Annually

|                                                                                                                                         | Earnings | Gross Tax Revenue | Job-Seeking Allowance | Employment and Support Allowance | Personal Independence Payment | Early Retirement Pension | Basic State Pension + Attendance Allowance | Health-care Costs | Total Transfers | Incremental Net Tax | Life-Years |
|-----------------------------------------------------------------------------------------------------------------------------------------|----------|-------------------|-----------------------|----------------------------------|-------------------------------|--------------------------|--------------------------------------------|-------------------|-----------------|---------------------|------------|
| <b>Base Case: OA Starts at Age 50, 15-year Time Horizon</b>                                                                             |          |                   |                       |                                  |                               |                          |                                            |                   |                 |                     |            |
| Moderate OA                                                                                                                             | £69 383  | £24 307           | -£589                 | -£2279                           | -£7072                        | -£4059                   | £0                                         | -£2034            | -£16034         | £40 341             | 0.000      |
| Severe OA                                                                                                                               | £126 384 | £44 925           | -£332                 | -£3475                           | -£11 724                      | -£7246                   | £0                                         | -£3051            | -£25 829        | £70 754             | 0.000      |
| <b>100% Males</b>                                                                                                                       |          |                   |                       |                                  |                               |                          |                                            |                   |                 |                     |            |
| Moderate OA                                                                                                                             | £66 599  | £23 378           | -£657                 | -£2078                           | -£6319                        | -£3711                   | £0                                         | -£2020            | -£14 784        | £38 162             | 0.000      |
| Severe OA                                                                                                                               | £128 794 | £45 826           | -£382                 | -£3409                           | -£11 273                      | -£7122                   | £0                                         | -£3030            | -£25 217        | £71 042             | 0.000      |
| <b>100% Females</b>                                                                                                                     |          |                   |                       |                                  |                               |                          |                                            |                   |                 |                     |            |
| Moderate OA                                                                                                                             | £69 805  | £24 414           | -£549                 | -£2380                           | -£7483                        | -£4221                   | £0                                         | -£2044            | -£16 677        | £41 092             | 0.000      |
| Severe OA                                                                                                                               | £122 815 | £43 613           | -£307                 | -£3477                           | -£11 880                      | -£7222                   | £0                                         | -£3066            | -£25 951        | £69 564             | 0.000      |
| <b>Lifetime Horizon</b>                                                                                                                 |          |                   |                       |                                  |                               |                          |                                            |                   |                 |                     |            |
| Moderate OA                                                                                                                             | £77 085  | £24 124           | -£589                 | -£2279                           | -£7072                        | -£4059                   | -£19,372                                   | -£3430            | -£36 802        | £60 926             | 0.000      |
| Severe OA                                                                                                                               | £134 369 | £44 817           | -£332                 | -£3475                           | -£11 724                      | -£7246                   | -£19,480                                   | -£5145            | -£47 403        | £92 220             | 0.000      |
| <b>Lifetime Horizon, SPA Increases to 67 Years</b>                                                                                      |          |                   |                       |                                  |                               |                          |                                            |                   |                 |                     |            |
| Moderate OA                                                                                                                             | £77 519  | £24 532           | -£595                 | -£2458                           | -£8317                        | -£4736                   | -£15,258                                   | -£3430            | -£34 794        | £59 326             | 0.000      |
| Severe OA                                                                                                                               | £135 061 | £45 231           | -£314                 | -£3556                           | -£13 404                      | -£8243                   | -£15,288                                   | -£5145            | -£45 950        | £91 181             | 0.000      |
| <b>Excess Healthcare Resources in Uncontrolled OA Pain Reduced by 10% (Base case used 20% for moderate and 30 for severe OA pain)</b>   |          |                   |                       |                                  |                               |                          |                                            |                   |                 |                     |            |
| Moderate OA                                                                                                                             | £69 383  | £24 307           | -£589                 | -£2279                           | -£7072                        | -£4059                   | £0                                         | -£1017            | -£15 017        | £39 324             | 0.000      |
| Severe OA                                                                                                                               | £126 384 | £44 925           | -£332                 | -£3475                           | -£11 724                      | -£7246                   | £0                                         | -£2034            | -£24 812        | £69 737             | 0.000      |
| <b>Excess Healthcare Resources in Uncontrolled OA Pain Increased by 10% (Base case used 20% for moderate and 30 for severe OA pain)</b> |          |                   |                       |                                  |                               |                          |                                            |                   |                 |                     |            |
| Moderate OA                                                                                                                             | £69 383  | £24 307           | -£589                 | -£2279                           | -£7072                        | -£4059                   | £0                                         | -£3051            | -£17 051        | £41 358             | 0.000      |
| Severe OA                                                                                                                               | £126 384 | £44 925           | -£332                 | -£3475                           | -£11 724                      | -£7246                   | £0                                         | -£4068            | -£26 846        | £71 771             | 0.000      |
| <b>Excess OA Pain Mortality</b>                                                                                                         |          |                   |                       |                                  |                               |                          |                                            |                   |                 |                     |            |
| Moderate OA                                                                                                                             | £69 506  | £24 358           | -£588                 | -£2275                           | -£7050                        | -£4044                   | £0                                         | -£2020            | -£15 976        | £40 335             | 0.012      |
| Severe OA                                                                                                                               | £126 450 | £44 957           | -£331                 | -£3470                           | -£11 695                      | -£7227                   | £0                                         | -£3036            | -£25 759        | £70 716             | 0.012      |
| <b>OA Starts at Age 45, 20-year Time Horizon</b>                                                                                        |          |                   |                       |                                  |                               |                          |                                            |                   |                 |                     |            |
| Moderate OA                                                                                                                             | £84 087  | £28 217           | -£803                 | -£2053                           | -£8268                        | -£4026                   | £0                                         | -£2530            | -£17 680        | £45 897             | 0.000      |
| Severe OA                                                                                                                               | £159 241 | £5681             | -£498                 | -£3119                           | -£14 484                      | -£7334                   | £0                                         | -£3795            | -£29 231        | £83 912             | 0.000      |

Abbreviations: OA, osteoarthritis; SPA, state pension age.

## REFERENCES

1. Ackerman IN, Ademi Z, Osborne RH, Liew D. Comparison of health-related quality of life, work status, and health care utilization and costs according to hip and knee joint disease severity: a national Australian study. *Phys Ther*. 2013;93(7):889-899. doi:10.2522/ptj.20120423.
2. Briggs A, Sculpher M, Claxton K. Decision modelling for health economic evaluation. Oxford University Press 2006.
3. Culliford DJ, Maskell J, Kiran A, et al. The lifetime risk of total hip and knee arthroplasty: results from the UK general practice research database. *Osteoarthritis Cartilage*. 2012;20(6):519-524. doi:10.1016/j.joca.2012.02.636.
4. Curtis LA, Burns A. Unit Costs of Health and Social Care 2019 Kent, UK2019 [176]. <https://www.pssru.ac.uk/project-pages/unit-costs/unit-costs-2019>. Accessed September 15, 2020.
5. Francis-Devine B. House of Commons Library. Average earnings by age and region. <https://commonslibrary.parliament.uk/research-briefings/cbp-8456/>. Accessed October 30, 2019.
6. Hart OR, Uden RM, McMullan JE, Ritchie MS, Williams TD, Smith BH. A study of National Health Service management of chronic osteoarthritis and low back pain. *Prim Health Care Res Dev*. 2015;16(2):157-166. doi:10.1017/S1463423614000140.
7. Hawker GA, Croxford R, Bierman AS, et al. All-cause mortality and serious cardiovascular events in people with hip and knee osteoarthritis: a population based cohort study. *PLoS One*. 2014;9(3):e91286. doi:10.1371/journal.pone.0091286.
8. Hubertsson J, Petersson IF, Thorstensson CA, Englund M. Risk of sick leave and disability pension in working-age women and men with knee osteoarthritis. *Ann Rheum Dis*. 2013;72(3):401-405. doi:10.1136/annrheumdis-2012-201472.
9. Kallala RF, Vanhegan IS, Ibrahim MS, Sarmah S, Haddad FS. Financial analysis of revision knee surgery based on NHS tariffs and hospital costs: does it pay to provide a revision service? *Bone Joint J*. 2015;97-b(2):197-201. doi:10.1302/0301-620x.97b2.33707
10. Laires PA, Canhao H, Rodrigues AM, Eusébio M, Gouveia M, Branco JC. The impact of osteoarthritis on early exit from work: results from a population-based study. *BMC Public Health*. 2018;18(1):472. doi:10.1186/s12889-018-5381-1
11. Morgan OJ, Hillstrom HJ, Ellis SJ, et al. Osteoarthritis in England: incidence trends from National Health Service hospital episode statistics. *ACR Open Rheumatol*. 2019;1(8):493-498. doi:10.1002/acr2.11071
12. National Joint Registry. National Joint Registry 17th annual report 2020. <https://reports.njrcentre.org.uk/Portals/0/PDFdownloads/NJR%2017th%20Annual%20Report%202020.pdf>. Accessed September 15, 2020.
13. National Health Service. National Schedule of NHS costs - Year 2018-19 - NHS trust and NHS foundation trusts 2020. <https://www.england.nhs.uk/national-cost-collection/#ncc1819>. Accessed September 24, 2020.
14. National Health Service. Drug Tariff. <https://www.nhsbsa.nhs.uk/pharmacies-gp-practices-and-appliance-contractors/drug-tariff>. Accessed September 15, 2020.
15. Office for National Statistics. Prevalence and employment 2019. Updated December 2, 2019. <https://www.ons.gov.uk/peoplepopulationandcommunity/healthandsocialcare/disability/datasets/prevalenceandemployment>. Accessed August 10, 2020.
16. Office for National Statistics. A05 NSA: Employment, unemployment and economic inactivity by age group 2020. <https://www.ons.gov.uk/employmentandlabourmarket/peopleinwork/employmentandemployeetypes/datasets/employmentunemploymentandeconomicinactivitybyagegroupnotseasonallyadjusteda05nsa>. Accessed August 10, 2020.
17. Office for National Statistics. 2020b. Employment by Age across different demographic and economic characteristics (Table 4) [Online]. <https://www.ons.gov.uk/employmentandlabourmarket/peopleinwork/employmentandemployeetypes/datasets/employmentunemploymentandeconomicinactivitybyagegroupnotseasonallyadjusteda05nsa>. Accessed August 10, 2020.
18. Office for National Statistics. INAC01 NSA: Economic inactivity by reason 2020. <https://www.ons.gov.uk/employmentandlabourmarket/peopleinwork/employmentandemployeetypes/datasets/employmentunemploymentandeconomicinactivitybyagegroupnotseasonallyadjusteda05nsa>. Accessed: August 10, 2020.
19. UK Government. Government Digital Service. Attendance Allowance. <https://www.gov.uk/attendance-allowance>. Accessed July 2020.
20. UK Government. Government Digital Service. Employment and Support Allowance (ESA). <https://www.gov.uk/employment-support-allowance/what-youll-get>. Accessed July 2020.
21. UK Government. Government Digital Service. Jobseeker's allowance (JSA). <https://www.gov.uk/jobseekers-allowance>. Accessed July 2020.
22. UK Government. Government Digital Service. The new State Pension. <https://www.gov.uk/new-state-pension/what-youll-get>. Accessed July 2020.
23. UK Government. Government Digital Service. Personal Independence Payment (PIP). <https://www.gov.uk/PIP>. Accessed July 2020.
24. Vanhegan IS, Malik AK, Jayakumar P, Ul Islam S, Haddad FS. A financial analysis of revision hip arthroplasty: the economic burden in relation to the national tariff. *J Bone Joint Surg Br*. 2012;94 (5):619-623. doi:10.1302/0301-620x.94b5.27073.
25. Wilkie R, Parmar SS, Blagojevic-Bucknall M, et al. Reasons why osteoarthritis predicts mortality: path analysis within a Cox proportional hazards model. *RMD Open*. 2019;5(2):e001048. doi:10.1136/rmdopen-2019-001048.
